# Supplementary material for: Sexual and psychological health of couples with azoospermia in the context of the COVID-19 pandemic
Source: PeerJ. 2021 Oct 20;9:e12162. doi: 10.7717/peerj.12162 (PMC8541304; doi:10.7717/peerj.12162)
Supplement: Supplemental Information 1 [file peerj-09-12162-s001.xlsx]

## Sheet: male
Grouping(1=Azoospermia,2=control)	Age	Sexual life frequency per month	Stress level（0=very high，1=high，2=general，3=low，4=none）	pressure(3)	Covid-19-related anxiety（0=none，1=slight，2=severe）	Anxiety(0=none，1=yes）	Anxiety score	Depression(0=none，1=yes）	Depression score	Conjugal relation（2=good，1=general，0=deteriorate）		Frequency of masturbation（0=increased，1=unchaged，2=decreased, 3=none）	Frequency of pornography use（0=increased，1=unchaged，2=decreased, 3=none）	Intimacy during sex life（0=No sexual activity ，5=Very satisfied ，4=Relatively satisfied，3=Neutral ，2=Dissatisfied ，1=Very dissatisfied）	Sexual satisfaction （0=No sexual activity ，5=Very satisfied ，4=Relatively satisfied，3=Neutral ，2=Dissatisfied ，1=Very dissatisfied）	SS	Dyspareunia（0=Almost always，1=Always ，2=Sometimes ，3=Rarely ，4=Never ，5=Never tried)	Orgasm	Desire	Erection	Intercourse satisfaction	Overall satisfaction	IIEF-15score（=Orgasm+Desire+Erection+Intercourse satisfaction+overall satisfaction）	Incidence of ED（5=none，4=slight，3=slight-middle，2=middle，1=severe）	Incidence of PE （2= PE，3= probable PE，4=none）		QMI score	Incidence of PE（2=PE，3=probable PE，4=none）	PE score	SD	income	physical exercise	smoker（0=yes，1=no）	drinking（0=almost ，1=often，2=sometimes, 3=rarely，4=never）	education（0=high school，1=college，2=undergraduate，3=postgraduate）	change in sexual desire（2=increase，1=unchange，0=decrease）	change in frequency（2=increase，1=unchange，0=decrease）	change in sexual satisfaction（2=increase，1=unchange，0=decrease）
1	34	5	2	1	0	0	5	0	8	2	1	1	1	3	3	2	3	6	6	21	9	6	48	3	4	1	4	4	5	1	2	1	1	3	0	1	1	1
1	39	3	2	1	0	0	2	0	5	2	1	3	3	4	4	3	3	7	6	25	10	8	56	4	3	0	31	4	6	1	1	1	0	3	0	1	1	1
1	28	6	2	1	0	0	3	0	5	2	1	3	3	4	4	3	4	8	6	26	11	8	59	5	3	0	34	4	5	1	2	0	1	3	0	1	1	1
1	33	4	0	0	0	0	0	0	3	2	1	3	3	5	5	3	4	6	4	28	10	10	58	5	3	0	33	4	5	1	3	2	0	3	1	1	1	1
1	30	1	0	0	0	0	2	0	4	2	1	1	1	4	4	3	2	7	7	21	9	8	52	3	4	1	29	4	6	1	2	0	0	3	2	1	1	1
1	45	3	2	1	0	0	4	0	5	0	1	1	1	5	5	3	5	9	6	28	12	10	65	5	4	0	36	4	3	1	3	2	0	3	2	0	0	1
1	33	3	0	0	1	1	12	1	15	1	1	1	1	1	1	1	2	4	5	24	12	2	47	4	3	0	17	3	10	0	2	2	0	0	1	2	2	2
1	28	5	2	1	0	0	5	0	7	2	1	1	1	4	3	2	5	10	8	29	11	7	65	5	3	0	36	3	9	1	3	2	0	2	0	1	1	1
1	28	1	0	0	1	1	11	1	15	0	0	0	0	1	2	1	2	4	4	13	5	3	29	2	2	1	9	2	12	0	2	0	1	1	2	0	0	0
1	35	8	2	1	1	1	10	1	13	2	1	1	3	4	4	3	3	7	6	23	11	8	55	4	4	0	26	4	5	1	2	2	1	3	0	1	1	1
1	35	1	0	0	0	0	0	0	3	1	1	1	1	4	4	3	5	6	6	28	11	8	59	5	4	0	29	4	3	1	3	2	1	3	0	1	1	1
1	35	4	2	1	1	1	10	1	13	2	1	1	1	5	4	3	5	10	8	30	12	9	69	5	3	0	35	4	5	1	2	2	1	4	3	1	1	1
1	31	5	1	0	0	0	0	0	3	2	1	2	2	5	4	3	4	9	6	29	13	9	66	5	3	0	34	4	5	1	2	0	0	3	1	0	0	1
1	34	8	1	0	0	0	3	0	5	2	1	3	3	5	5	3	5	9	7	29	14	10	69	5	4	0	45	4	3	1	3	1	0	2	2	1	1	1
1	33	2	1	0	0	0	0	0	4	2	1	3	3	5	5	3	5	7	6	29	9	10	61	5	3	0	41	4	4	1	2	0	0	2	0	2	1	2
1	29	2	1	0	2	1	21	1	15	0	0	0	0	1	1	1	2	5	4	13	5	2	29	2	2	1	13	2	12	0	2	0	1	2	2	0	0	0
1	28	4	1	0	1	1	11	1	15	2	1	1	3	4	4	3	3	10	6	23	10	8	57	4	3	0	22	4	6	1	1	1	0	3	0	1	1	1
1	30	6	2	1	1	1	10	1	14	2	1	3	3	4	5	3	3	8	7	26	13	9	63	5	3	0	44	4	6	1	2	2	1	4	1	1	1	1
1	41	3	3	2	0	0	0	0	3	2	1	1	1	5	5	3	5	6	7	30	12	10	65	5	4	0	30	4	3	1	2	1	0	3	0	1	1	1
1	30	5	1	0	0	0	2	0	4	2	1	3	3	5	5	3	3	10	7	28	13	10	68	5	4	0	44	4	5	1	2	1	1	4	1	1	1	1
1	30	2	2	1	0	0	6	0	6	2	1	3	3	4	3	2	2	6	8	17	5	7	43	3	2	1	25	3	9	0	1	2	1	4	1	1	1	1
1	39	2	2	1	1	1	11	1	16	2	1	1	3	4	3	2	5	7	5	27	11	7	57	5	3	0	20	3	10	1	2	2	0	0	0	1	1	1
1	37	9	2	1	0	0	0	0	3	2	1	1	1	4	5	3	3	10	6	24	12	9	61	4	3	0	31	4	7	1	2	2	0	2	1	1	1	1
1	34	5	2	1	0	0	4	0	5	2	1	1	1	4	4	3	5	10	6	29	13	8	66	5	4	0	34	4	3	1	2	1	1	4	0	1	1	1
1	32	4	2	1	0	0	0	0	6	2	1	1	1	4	4	3	5	9	7	30	12	8	66	5	4	0	35	4	3	1	3	2	1	3	2	1	1	1
1	32	1	3	2	1	1	12	1	17	2	1	3	3	3	3	2	5	3	2	15	3	6	29	2	2	1	22	2	11	0	1	2	0	3	0	1	1	1
1	30	4	2	1	1	1	13	1	15	2	1	3	3	4	5	3	5	7	8	29	12	9	65	5	4	0	42	4	3	1	2	1	0	3	2	2	0	1
1	35	3	3	2	0	0	5	0	8	2	1	3	2	4	3	2	4	9	6	22	10	7	54	4	4	0	28	4	4	1	2	1	0	2	1	0	0	1
1	42	4	2	1	0	0	0	0	3	2	1	1	1	4	4	3	4	6	6	25	8	8	53	4	4	0	22	4	4	1	2	2	1	4	2	1	1	1
1	29	10	2	1	0	0	6	0	8	2	0	0	0	2	2	1	2	6	5	17	10	4	42	3	2	1	20	2	12	0	2	2	1	4	3	0	0	0
1	38	2	1	0	2	1	18	1	18	1	1	1	1	3	3	2	2	9	6	20	7	6	48	3	4	1	19	4	6	1	3	0	0	2	2	1	1	1
1	35	3	1	0	2	1	20	1	21	0	1	1	1	2	2	1	1	6	4	15	8	4	37	2	3	1	18	3	9	0	2	0	1	2	2	1	1	1
1	43	3	1	0	0	0	0	0	3	2	1	1	1	4	4	3	3	6	6	21	8	8	49	3	2	1	28	4	8	1	1	1	1	3	1	1	1	1
1	27	5	0	0	1	1	11	1	17	2	1	3	3	3	3	2	5	9	10	29	11	6	65	5	4	0	30	4	3	1	1	2	0	2	0	1	1	1
1	42	3	2	1	0	0	6	0	7	2	0	0	0	2	2	1	2	6	4	15	6	4	35	2	2	1	18	2	11	0	2	1	0	2	1	0	0	0
1	38	2.5	2	1	0	0	2	0	5	2	1	1	1	4	4	3	3	8	6	24	10	8	56	4	4	0	31	4	5	1	2	2	1	3	2	1	1	1
1	40	8	2	1	0	0	1	0	4	2	1	1	1	4	4	3	5	8	6	27	12	8	61	5	3	0	36	4	4	1	2	1	1	3	3	1	1	1
1	35	5.5	1	0	1	1	10	1	15	2	1	1	3	4	4	3	5	9	6	27	11	8	61	5	4	0	34	4	3	1	2	0	0	4	2	1	1	1
1	35	2	2	1	0	0	7	1	10	2	1	2	3	2	2	1	2	6	8	16	5	4	39	2	2	1	15	2	13	0	2	2	1	3	2	1	0	1
1	33	1	0	0	2	1	19	1	22	0	0	0	0	2	2	1	2	7	6	17	7	4	41	3	3	1	17	3	10	0	3	0	1	1	3	0	0	0
1	38	1	1	0	2	1	18	1	22	0	0	0	0	2	1	1	2	6	6	12	5	3	32	2	2	1	16	2	11	0	2	0	1	2	2	0	0	0
1	36	1	2	1	2	1	18	1	23	0	0	0	0	2	2	1	2	6	8	18	7	4	43	3	3	1	18	3	9	0	3	1	1	2	2	2	2	0
1	29	4	4	2	0	0	1	0	5	2	1	3	3	5	5	3	5	10	5	28	12	10	65	5	4	0	41	4	3	1	2	1	0	3	1	1	1	1
1	34	6	1	0	0	0	5	0	5	2	1	3	1	5	4	3	5	8	6	27	11	9	61	5	4	0	44	4	3	1	2	1	0	4	1	1	1	1
1	38	2	1	0	0	0	2	0	4	2	1	2	3	4	4	3	2	7	6	22	9	8	52	4	4	0	30	4	6	1	1	2	1	4	2	1	1	1
1	39	8	2	1	1	1	12	1	18	2	1	2	2	4	4	3	4	8	7	25	10	8	58	4	3	0	36	4	5	1	2	2	1	2	2	1	1	1
1	30	9	2	1	1	1	11	1	15	2	1	1	3	5	4	3	2	6	5	23	12	9	55	4	3	0	28	4	7	1	1	2	0	3	2	1	1	1
1	27	8	1	0	0	0	1	0	4	2	1	3	1	4	5	3	4	10	6	28	14	9	67	5	4	0	41	4	4	1	2	0	0	3	0	1	0	1
1	42	2	1	0	0	0	5	0	5	2	1	1	1	4	5	3	4	10	6	28	9	9	62	5	4	0	36	4	4	1	2	2	1	2	3	1	1	1
1	40	4	1	0	0	0	3	0	4	2	1	1	1	4	4	3	3	6	6	25	10	8	55	4	4	0	22	4	5	1	2	1	0	3	2	1	1	1
1	42	1.5	1	0	0	0	5	0	7	2	1	1	1	3	3	2	2	7	6	20	7	6	46	3	4	1	10	4	6	1	3	2	1	3	3	1	1	1
1	43	2	2	1	1	1	11	1	16	2	1	1	3	2	1	1	1	4	4	11	5	3	27	2	2	1	15	2	13	0	2	0	1	3	0	1	1	1
1	32	8	1	0	0	0	2	0	5	2	1	2	3	3	4	3	4	9	8	28	12	7	64	5	3	0	32	3	10	1	2	2	1	1	2	1	1	1
1	31	8	0	0	0	0	6	0	7	1	1	1	1	1	1	1	4	5	7	20	8	2	42	3	4	1	22	4	4	1	3	2	0	3	2	1	1	1
1	36	3.5	1	0	0	0	7	0	9	2	1	2	1	4	3	2	2	4	7	17	6	7	41	3	2	1	32	3	9	0	3	0	1	3	2	1	1	1
1	37	2	2	1	0	0	5	0	7	2	1	1	3	3	3	2	4	7	6	27	9	6	55	5	4	0	19	4	4	1	3	2	1	4	3	1	1	1
1	28	10	2	1	0	0	4	0	5	2	1	3	3	3	4	3	5	8	7	29	12	7	63	5	3	0	25	3	9	1	2	0	0	4	2	1	1	1
1	32	2	1	0	0	0	8	1	12	2	1	1	1	2	2	1	4	5	6	23	5	4	43	4	3	0	17	3	10	0	2	1	1	3	2	1	1	1
1	33	2	1	0	1	1	10	1	20	2	1	1	1	4	4	3	5	9	6	27	9	8	59	5	3	0	20	4	5	1	2	0	1	3	2	1	1	1
1	30	4	3	2	0	0	6	0	9	2	1	1	1	3	2	1	2	4	7	15	6	5	37	2	2	1	13	2	13	0	1	1	1	3	0	1	1	1
1	33	3	2	1	0	0	5	0	9	2	1	2	3	3	3	2	3	4	4	20	6	6	40	3	4	1	30	4	5	1	1	1	1	4	0	1	1	1
1	28	10	2	1	1	1	11	1	15	2	1	1	1	4	4	3	3	9	6	26	12	8	61	5	4	0	31	4	5	1	2	0	0	2	0	1	1	1
1	32	2	2	1	0	0	5	0	5	2	1	1	1	3	3	2	2	5	7	20	7	6	45	3	3	1	19	3	9	0	1	1	1	2	0	1	1	1
1	34	2	2	1	0	0	4	0	5	2	1	1	1	4	4	3	5	7	6	26	9	8	56	5	4	0	30	4	3	1	2	2	1	3	3	1	1	1
1	35	6	2	1	0	0	2	0	4	2	1	1	1	5	5	3	5	9	4	27	11	10	61	5	4	0	35	4	3	1	2	2	1	4	2	1	1	1
1	38	1	2	1	1	1	11	1	17	2	1	2	1	2	2	1	2	6	5	17	7	4	39	3	2	1	16	2	12	0	3	2	1	1	2	1	1	1
1	36	2	0	0	2	1	19	1	20	0	0	0	0	2	2	1	2	6	7	18	7	4	42	3	2	1	17	2	11	0	2	2	1	4	0	0	0	0
1	38	2	0	0	0	0	6	0	9	1	1	2	1	2	1	1	0	4	6	12	5	3	30	2	3	1	17	3	10	0	1	0	1	3	0	1	1	1
1	36	1.5	0	0	1	1	11	1	15	1	1	1	2	1	1	1	5	6	4	23	7	2	42	4	3	0	16	3	9	0	2	2	0	1	3	0	0	0
1	38	1	3	2	0	0	6	0	4	2	1	2	1	4	1	1	2	8	10	17	7	5	47	3	2	1	28	2	13	0	2	2	1	3	0	1	0	0
1	38	2	1	0	0	0	6	1	10	1	0	0	0	2	2	1	2	9	7	21	7	4	48	3	3	1	17	3	10	0	3	1	1	3	3	1	1	1
1	27	2	3	2	2	1	19	1	22	0	0	0	0	2	2	1	4	8	7	26	9	4	54	5	3	0	16	3	9	1	2	0	0	1	1	1	0	0
1	33	1.5	2	1	1	1	11	1	16	1	1	2	1	2	2	1	2	8	4	22	9	4	47	4	3	0	27	3	10	0	2	1	1	3	2	1	1	1
1	31	1	1	0	2	1	19	1	21	0	0	0	0	3	2	1	4	7	6	27	9	5	54	5	2	0	17	2	12	1	2	2	0	4	1	0	0	0
1	36	2	1	0	0	0	6	1	12	2	1	1	1	2	1	1	5	8	6	22	5	3	44	4	4	0	17	4	3	1	3	0	1	3	2	1	0	0
1	40	5	1	0	0	0	2	0	5	2	1	2	3	4	4	3	2	8	5	21	9	8	51	3	4	1	33	4	6	1	2	2	1	3	2	1	1	1
1	42	10	0	0	1	1	12	1	23	2	0	0	0	4	4	3	4	10	8	27	12	8	65	5	4	0	31	4	4	1	2	2	0	3	1	1	2	0
1	35	3.5	2	1	0	0	2	0	3	2	1	1	1	4	4	3	5	8	6	26	10	8	58	5	4	0	32	4	3	1	1	2	1	2	0	1	1	1
1	31	4	2	1	1	1	13	1	15	2	1	1	1	4	4	3	5	10	8	25	8	8	59	4	4	0	22	4	3	1	2	1	1	2	1	1	1	1
1	28	12	3	2	0	0	2	0	6	2	1	1	1	5	5	3	5	7	7	30	15	10	69	5	4	0	32	4	3	1	1	2	1	2	1	1	1	1
1	34	6	2	1	1	1	11	1	15	2	1	1	1	4	4	3	2	7	6	22	11	8	54	4	4	0	34	4	6	1	2	2	0	3	1	1	1	1
1	29	10	2	1	0	0	2	0	4	2	1	1	3	4	4	3	5	7	6	24	12	8	57	4	4	0	29	4	3	1	1	1	1	3	2	1	1	1
1	36	5	2	1	0	0	3	0	3	2	1	2	3	5	4	3	4	9	6	28	13	9	65	5	3	0	34	4	6	1	2	0	1	1	0	1	1	1
1	33	5	2	1	1	1	12	1	22	2	1	2	3	4	4	3	5	6	6	26	11	8	57	5	3	0	33	4	4	1	1	1	0	2	0	1	2	1
1	42	6	2	1	0	0	3	0	3	2	1	3	3	5	5	3	5	9	7	30	13	10	69	5	4	0	45	4	3	1	1	2	1	2	0	1	1	1
1	30	5.5	2	1	0	0	2	0	4	2	1	1	1	5	5	3	5	10	7	29	13	10	69	5	4	0	37	4	3	1	2	1	1	3	2	1	1	1
1	29	7	1	0	1	1	13	1	16	2	1	1	3	4	4	3	5	9	6	27	12	8	62	5	3	0	38	4	4	1	3	2	0	3	0	1	1	1
1	44	5.5	2	1	0	0	2	0	7	2	1	3	3	5	5	3	3	9	6	26	13	10	64	5	3	0	45	4	6	1	1	2	0	3	0	1	1	1
1	32	10	3	2	1	1	14	1	19	2	1	2	3	4	4	3	2	8	8	21	12	8	57	3	3	1	38	4	8	1	3	2	0	3	0	1	1	1
1	32	5	2	1	0	0	3	0	8	2	1	2	1	4	4	3	2	9	7	22	11	8	57	4	4	0	33	4	6	1	2	2	1	3	2	1	1	1
1	28	4	2	1	1	1	11	1	16	2	1	2	3	4	5	3	5	7	7	30	12	9	65	5	4	0	32	4	3	1	2	2	0	3	0	1	1	1
1	34	6	2	1	0	0	2	0	2	2	1	2	1	3	5	3	5	8	5	28	11	8	60	5	4	0	33	4	3	1	2	2	1	4	0	1	1	1
1	42	6.5	1	0	0	0	2	0	5	2	1	3	3	4	4	3	4	10	6	25	8	8	57	4	4	0	35	4	4	1	2	1	0	3	2	1	1	1
1	42	2	0	0	1	1	12	1	16	1	1	2	2	3	3	2	2	8	5	14	5	6	38	2	3	1	18	3	9	0	1	0	1	4	2	0	0	0
1	42	2	1	0	1	1	14	1	19	2	1	2	2	3	3	2	2	4	3	15	5	6	33	2	3	1	19	3	9	0	1	1	1	2	1	1	1	1
1	35	2	2	1	0	0	6	0	6	2	1	2	3	3	3	2	4	9	5	27	9	6	56	5	3	0	29	3	9	1	1	2	1	4	0	1	1	1
1	28	1	2	1	0	0	6	0	8	2	1	2	2	5	3	2	2	6	7	22	9	8	52	4	3	0	30	4	7	1	2	0	0	4	0	1	1	1
1	31	2	1	0	1	1	13	1	20	2	1	1	3	3	3	2	2	5	6	16	5	6	38	2	3	1	16	3	9	0	2	1	1	4	2	1	1	1
1	39	1.5	2	1	0	0	3	0	3	2	1	2	3	4	3	2	2	6	5	17	9	7	44	3	3	1	30	3	9	0	1	2	0	2	0	1	1	1
1	39	2	0	0	1	1	10	1	19	2	1	3	3	4	3	2	3	7	2	21	9	7	46	3	2	1	23	4	8	1	1	2	1	3	2	1	1	1
2	39	4	2	1	0	0	2	0	3	1	1	3	3	4	4	3	3	7	6	25	12	8	58	4	2	0	32	4	8	1	2	2	1	2	2	1	1	1
2	32	3	1	0	1	1	10	1	16	2	1	3	3	4	4	3	5	10	6	30	12	8	66	5	4	0	41	4	3	1	3	2	1	4	2	1	1	1
2	42	3	1	0	0	0	2	0	2	2	1	3	2	5	4	3	4	6	7	26	10	9	58	5	4	0	32	4	4	1	2	2	0	1	1	1	1	1
2	34	8	2	1	1	1	12	1	19	2	1	1	1	4	3	2	2	6	6	20	12	7	51	3	4	1	26	4	6	1	2	2	1	3	2	1	1	1
2	43	5	1	0	0	0	2	0	2	2	1	1	1	4	4	3	5	7	5	24	9	8	53	4	4	0	33	4	3	1	2	2	0	2	2	1	1	1
2	32	7.5	1	0	1	1	12	1	16	2	1	3	3	5	5	3	5	10	9	29	14	10	72	5	4	0	42	4	3	1	3	1	1	3	2	1	1	1
2	32	3	2	1	0	0	2	0	4	2	1	2	3	4	4	3	4	8	6	22	6	8	70	4	4	0	31	4	4	1	1	1	0	2	3	0	1	1
2	38	6	2	1	0	0	3	0	4	2	1	2	3	4	4	3	3	8	6	25	11	8	58	4	3	0	34	4	7	1	1	1	1	2	1	1	1	1
2	39	4	2	1	0	0	2	0	4	2	1	3	3	1	4	3	4	10	5	26	10	5	56	5	4	0	30	4	4	1	2	2	1	3	2	1	1	1
2	40	8	1	0	2	1	15	1	20	2	1	3	3	5	5	3	5	9	6	30	14	10	69	5	4	0	45	4	3	1	1	2	0	2	2	0	0	1
2	33	3.5	2	1	0	0	2	0	4	2	1	2	3	5	5	3	3	8	8	26	10	10	62	5	4	0	33	4	5	1	2	2	1	3	3	1	1	1
2	36	5	3	2	0	0	2	0	3	2	1	1	1	4	4	3	4	8	6	27	11	8	60	5	3	0	33	4	5	1	2	1	1	4	2	1	1	1
2	30	4	2	1	0	0	2	0	2	2	1	3	1	4	4	3	4	8	6	27	10	8	59	5	4	0	32	4	4	1	1	0	0	2	0	1	1	1
2	29	7	2	1	0	0	1	0	4	2	1	1	3	5	5	3	5	7	6	27	12	10	62	5	4	0	36	4	3	1	2	0	1	4	0	1	1	1
2	35	4	2	1	0	0	2	0	2	2	1	1	1	5	5	3	5	9	5	30	12	10	66	5	4	0	32	4	3	1	3	0	0	4	0	1	1	1
2	32	3	2	1	0	0	1	0	2	2	1	1	1	4	4	3	4	8	5	27	10	8	58	5	4	0	31	4	4	1	2	2	0	3	3	1	1	1
2	35	3	0	0	0	0	6	0	4	0	1	3	2	3	3	2	2	9	7	18	6	6	46	3	2	1	23	3	9	0	1	1	1	4	2	1	2	1
2	34	5	2	1	1	1	10	1	19	2	1	3	1	4	3	2	5	8	8	26	9	7	58	5	3	0	25	3	9	1	2	2	1	2	0	1	1	1
2	35	4	2	1	0	0	2	0	2	2	1	1	2	4	4	3	2	8	5	22	6	8	49	4	4	0	32	4	6	1	2	2	1	2	2	0	0	1
2	34	8	4	2	0	0	2	0	6	2	1	3	3	5	5	3	5	10	6	29	14	10	69	5	4	0	40	4	3	1	2	0	0	3	0	2	2	1
2	38	5	0	0	0	0	7	1	13	1	1	1	1	2	1	1	3	5	9	23	13	3	53	4	2	0	20	3	9	0	3	1	0	4	2	1	1	1
2	33	5	2	1	0	0	3	0	3	2	1	1	1	5	5	3	4	10	8	29	13	10	70	5	4	0	38	4	4	1	1	2	1	4	1	1	1	1
2	33	6	2	1	0	0	3	0	2	2	1	1	1	5	4	3	2	8	4	21	13	9	55	3	3	1	35	4	8	1	2	1	0	3	1	1	1	1
2	34	5	2	1	0	0	2	0	5	2	1	1	1	4	4	3	5	8	7	29	11	8	63	5	4	0	38	4	3	1	1	2	1	3	2	1	1	1
2	34	3	0	0	0	0	1	0	2	2	1	1	3	4	5	3	5	8	6	27	12	9	62	5	4	0	36	4	3	1	2	2	1	4	2	1	1	1
2	32	4	2	1	1	1	13	1	18	2	1	3	3	3	3	2	2	6	5	19	8	6	44	3	2	1	18	3	9	0	1	0	1	4	0	1	1	1
2	34	7	2	1	0	0	2	0	4	2	1	3	3	5	5	3	4	10	10	30	14	10	74	5	4	0	45	4	4	1	1	2	1	3	1	1	1	1
2	42	1	1	0	0	0	6	0	2	2	1	2	3	3	3	2	2	5	5	18	7	6	41	3	2	1	28	3	9	0	1	2	0	3	1	1	1	1
2	41	3.5	2	1	1	1	13	1	16	2	1	1	0	4	4	3	3	8	8	26	10	8	60	5	4	0	32	4	5	1	2	0	1	3	2	1	1	1
2	39	4	2	1	2	1	16	1	17	2	1	1	1	4	4	3	5	6	5	25	10	8	54	4	4	0	42	4	3	1	3	0	0	2	2	1	1	1
2	34	5	1	0	1	1	11	1	15	2	1	1	3	4	4	3	5	9	7	28	13	8	65	5	3	0	35	4	4	1	2	1	1	3	2	2	2	1
2	33	10	2	1	0	0	4	0	5	2	1	1	1	5	5	3	5	8	8	29	12	10	67	5	4	0	39	4	3	1	3	2	0	2	0	1	1	1
2	34	3	2	1	0	0	3	0	4	2	1	3	3	5	4	3	5	9	8	29	12	9	67	5	4	0	42	4	3	1	3	0	1	3	2	1	1	1
2	38	4	2	1	0	0	4	0	5	2	1	1	1	4	4	3	4	7	7	25	8	8	55	4	4	0	33	4	4	1	2	2	1	4	3	1	1	1
2	38	1	2	1	0	0	8	0	7	2	1	1	1	3	2	1	1	6	5	12	5	5	33	2	4	1	15	4	7	1	2	1	1	3	2	1	1	0
2	32	10	2	1	0	0	4	0	5	2	1	1	1	5	5	3	5	8	6	26	12	10	62	5	4	0	32	4	3	1	2	1	0	3	2	1	1	1
2	36	6	1	0	0	0	4	0	5	2	1	2	2	5	5	3	3	10	7	28	13	10	68	5	4	0	35	4	5	1	1	2	1	2	3	0	0	0
2	35	4	0	0	1	1	10	1	16	2	1	2	3	4	4	3	2	9	3	23	10	8	53	4	3	0	32	4	7	1	2	1	1	3	2	1	1	1
2	37	9	3	2	0	0	4	0	7	2	1	1	1	4	5	3	5	9	8	28	14	9	68	5	4	0	37	4	3	1	2	1	1	2	0	1	1	1
2	39	2	0	0	1	1	13	1	18	2	1	1	1	3	3	2	5	9	5	30	11	6	61	5	4	0	36	4	3	1	1	0	0	3	0	1	1	1
2	33	4	2	1	0	0	4	0	3	1	1	1	1	4	4	3	2	7	6	21	10	8	52	3	2	1	22	3	9	0	2	0	1	2	2	1	1	1
2	32	2	2	1	1	1	13	1	17	2	1	1	1	1	2	1	1	10	5	21	11	3	50	3	3	1	16	3	9	0	2	0	1	4	2	1	1	1
2	39	5	0	0	0	0	4	0	4	2	1	1	1	5	5	3	5	8	5	26	11	10	60	5	4	0	34	4	3	1	2	1	1	3	0	1	1	1
2	43	7	1	0	0	0	2	0	2	2	1	1	1	4	4	3	3	10	7	28	14	8	67	5	4	0	35	4	5	1	3	0	1	4	1	1	1	1
2	33	2	0	0	0	0	6	0	7	2	1	1	3	4	3	2	1	7	4	13	3	7	34	2	3	1	20	3	9	0	2	2	1	2	1	1	1	1
2	44	7	1	0	0	0	2	0	3	2	1	3	3	5	5	3	4	10	6	28	12	10	66	5	4	0	32	4	4	1	3	2	1	2	3	1	1	1
2	34	3	1	0	1	1	11	1	16	2	0	0	1	5	5	3	5	9	8	30	12	10	69	5	3	0	32	4	4	1	2	1	1	4	1	2	2	2
2	44	5	2	1	0	0	2	0	2	2	1	1	3	5	4	3	5	10	7	27	11	9	64	5	4	0	34	4	3	1	2	0	0	4	2	0	0	1
2	36	5	2	1	0	0	9	0	9	1	0	0	0	1	1	1	5	10	10	30	13	2	65	5	4	0	30	4	3	1	2	2	0	3	2	2	1	0
2	30	4	3	2	0	0	2	0	3	2	1	2	2	4	4	3	3	8	6	24	10	8	56	4	4	0	32	4	5	1	2	1	1	3	2	1	1	1
2	36	6	3	2	1	1	13	1	13	2	0	0	1	2	2	1	2	7	5	18	9	4	43	3	2	1	19	3	9	0	1	2	1	2	1	0	0	0
2	33	10	2	1	0	0	1	0	2	2	1	1	3	5	5	3	5	8	6	28	12	10	64	5	4	0	37	4	3	1	2	0	1	4	2	1	1	1
2	33	4	2	1	0	0	6	0	5	2	1	1	1	3	3	2	3	9	6	24	8	6	53	4	4	0	21	4	5	1	2	2	0	1	2	0	0	1
2	38	5	2	1	1	1	13	1	18	2	1	1	1	4	3	2	5	9	6	25	11	7	58	4	4	0	23	4	3	1	2	1	1	2	0	1	1	1
2	30	4	1	0	0	0	0	0	1	2	1	3	3	4	4	3	4	6	5	25	10	8	54	4	3	0	32	4	5	1	3	0	0	2	0	1	1	1
2	41	3	2	1	1	1	12	1	17	2	1	3	3	4	4	3	3	8	6	25	10	8	57	4	4	0	31	4	5	1	2	0	1	4	2	1	0	1
2	36	4	1	0	0	0	2	0	2	2	1	2	3	4	4	3	3	6	6	22	8	8	50	4	3	0	32	4	6	1	1	2	1	4	1	1	1	1
2	35	6	2	1	0	0	6	0	7	2	1	2	2	2	2	1	2	7	5	18	9	4	43	3	2	1	31	3	9	0	2	1	0	3	2	0	0	0
2	35	7	2	1	1	1	10	1	11	2	1	3	3	4	4	3	5	7	7	27	12	8	61	5	3	0	45	4	4	1	2	2	1	3	0	1	1	1
2	35	1	1	0	0	0	0	0	1	1	1	1	1	5	5	3	5	8	8	29	11	10	66	5	3	0	30	4	4	1	1	1	1	3	2	1	1	0
2	36	10	1	0	0	0	1	0	2	2	1	3	3	5	4	3	4	10	6	28	12	9	65	5	4	0	41	4	4	1	2	1	0	3	0	1	1	1
2	34	6	1	0	1	1	14	1	17	1	1	1	1	4	4	3	3	9	7	26	11	8	61	5	3	0	34	4	7	1	2	1	1	3	2	1	1	1
2	38	3	2	1	0	0	6	0	2	2	1	1	1	3	3	2	2	10	6	21	8	6	51	3	3	1	20	4	7	1	1	0	1	3	1	1	1	1
2	32	7	2	1	1	1	11	1	12	2	1	2	3	4	4	3	0	7	6	16	10	8	47	2	4	1	35	4	8	1	1	2	1	3	0	1	1	1
2	32	2	2	1	0	0	0	0	2	1	1	1	1	4	4	3	3	9	6	24	9	8	56	4	3	0	30	4	6	1	2	1	0	4	2	1	1	1
2	43	7.5	1	0	0	0	0	0	2	2	1	1	1	4	4	3	5	8	6	26	12	8	60	5	3	0	36	4	5	1	2	0	0	2	3	1	1	1
2	29	7	3	2	0	0	0	0	0	2	1	3	3	5	5	3	5	8	5	28	12	10	63	5	4	0	41	4	3	1	2	2	1	3	0	1	1	1
2	26	10	1	0	0	0	8	0	8	0	0	0	0	2	2	1	2	7	6	18	10	4	45	3	2	1	15	3	9	0	2	0	0	3	0	0	0	0
2	39	4	2	1	1	1	13	1	15	2	1	1	3	2	2	1	4	8	8	27	10	4	57	5	3	0	19	3	9	1	1	0	0	3	1	1	0	1
2	36	2.5	4	2	0	0	6	0	2	2	1	3	3	3	3	2	5	9	6	27	12	6	60	5	4	0	30	4	3	1	1	2	0	4	0	1	1	1
2	25	3	3	2	1	1	13	1	18	2	0	0	0	2	2	1	3	9	8	23	8	4	52	4	4	0	25	4	5	1	2	0	0	3	0	0	0	0
2	31	3	1	0	1	1	11	1	17	2	1	1	0	4	4	3	3	9	6	24	10	8	57	4	2	0	31	4	8	1	3	1	0	2	1	0	0	1
2	31	7	2	1	1	1	13	1	13	2	1	3	3	4	5	3	3	10	6	26	12	9	63	5	4	0	45	4	5	1	2	2	1	4	2	1	1	1
2	34	2	0	0	1	1	10	1	17	2	1	2	1	4	4	3	2	8	6	22	9	8	53	4	3	0	30	4	7	1	2	1	0	3	1	0	0	1
2	30	5	1	0	0	0	1	0	3	2	1	1	1	4	4	3	5	9	5	23	9	8	54	4	4	0	33	4	3	1	1	2	1	3	1	1	1	1
2	35	5	2	1	0	0	2	0	3	2	1	1	1	4	4	3	5	6	4	23	9	8	50	4	4	0	36	4	3	1	3	1	0	4	2	1	1	1
2	43	7	0	0	1	1	13	1	16	2	0	0	0	2	2	1	4	10	8	27	12	4	61	5	4	0	33	4	4	1	2	1	0	2	1	1	1	0
2	37	4	2	1	0	0	4	0	3	2	1	2	2	3	3	2	2	6	7	19	6	6	44	3	3	1	31	4	7	1	2	2	1	4	0	0	0	0
2	26	5	1	0	0	0	1	0	1	2	1	1	1	4	4	3	5	8	7	29	13	8	65	5	3	0	33	4	4	1	2	2	0	4	2	1	2	2
2	31	8	2	1	1	1	14	1	18	2	1	2	3	4	3	2	2	7	7	18	10	7	49	3	3	1	36	3	9	0	1	2	1	3	1	1	1	1
2	35	6	2	1	1	1	10	1	17	2	1	2	2	4	4	3	2	7	6	21	9	8	51	3	2	1	34	3	9	0	2	1	0	2	2	1	1	1
2	40	4	2	1	1	0	7	0	9	2	1	1	1	4	4	3	0	8	6	19	10	8	51	3	4	1	43	4	8	1	2	2	1	4	3	1	1	1
2	32	3	2	1	0	0	4	0	6	2	1	1	1	3	3	2	4	8	6	25	10	6	55	4	4	0	20	4	4	1	2	2	1	4	2	1	1	1
2	31	10	2	1	0	0	2	0	3	2	1	3	3	4	3	2	4	6	6	25	12	7	56	4	4	0	30	4	4	1	1	1	0	4	0	1	1	1
2	33	4.5	2	1	0	0	3	0	3	2	1	2	1	5	5	3	5	9	7	30	13	10	69	5	4	0	34	4	3	1	2	2	1	3	2	1	1	1
2	33	5	2	1	0	0	4	0	5	2	1	1	3	3	3	2	4	4	5	24	11	6	50	4	4	0	22	4	4	1	2	1	0	2	1	1	1	1
2	38	6	2	1	0	0	3	0	3	2	1	3	3	5	5	3	5	9	4	29	13	10	65	5	4	0	45	4	3	1	1	2	1	2	2	1	1	1
2	32	4	2	1	0	0	2	0	5	2	1	3	3	4	4	3	4	9	6	27	10	8	60	5	3	0	32	4	5	1	3	2	0	2	2	1	1	1
2	36	10	1	0	0	0	4	0	5	2	1	2	3	3	3	2	2	4	8	18	10	6	46	3	3	1	37	4	7	1	1	0	1	2	0	1	1	1
2	28	5	2	1	0	0	3	0	2	2	1	3	3	4	4	3	4	8	5	28	11	8	60	5	4	0	33	4	4	1	2	0	0	1	2	1	1	1
2	37	4	2	1	0	0	1	0	5	2	1	2	1	4	4	3	3	7	6	24	10	8	55	4	3	0	32	4	7	1	2	2	1	3	2	1	1	1
2	28	5	2	1	0	0	2	0	5	2	1	3	3	4	5	3	5	10	8	29	13	9	69	5	4	0	43	4	3	1	1	1	0	1	2	1	1	1
2	35	1	1	0	0	0	4	0	6	2	1	1	1	2	3	2	1	4	6	13	5	5	33	2	2	1	15	2	11	0	2	1	1	3	1	1	1	1
2	33	5	2	1	0	0	3	0	4	2	1	1	3	4	4	3	4	9	6	28	11	8	62	5	3	0	34	4	5	1	2	1	1	4	1	1	1	1
2	34	5	2	1	0	0	3	0	4	2	1	3	3	5	5	3	5	8	6	28	11	10	63	5	4	0	44	4	3	1	2	2	1	3	2	1	1	1
2	37	7	3	2	1	0	9	1	15	2	1	1	1	4	4	3	4	8	5	29	12	8	62	5	4	0	35	4	4	1	2	1	1	2	0	1	1	1
2	36	7.5	2	1	0	0	3	0	4	2	1	3	3	4	3	2	5	9	6	26	12	7	60	5	4	0	30	4	3	1	1	2	1	4	2	1	0	1
2	36	3	3	2	0	0	3	0	5	2	1	3	3	3	4	3	5	10	7	28	10	7	62	5	4	0	40	4	3	1	2	1	1	3	2	1	1	1
2	38	3	2	1	2	1	14	1	18	2	1	3	3	3	4	3	2	6	4	19	8	7	44	3	4	1	25	4	6	1	2	0	0	0	1	1	0	0
2	35	8	2	1	0	0	2	0	4	2	1	2	3	3	3	2	5	8	6	27	12	6	59	5	4	0	35	4	3	1	2	2	1	4	2	1	0	1

## Sheet: female 
Group(1=Azoospermia,2=control)	Age	Sexual life frequency	Stress level（0=very high，1=high，2=general，3=low，4=none）	pressure(3)	Covid-19-related anxiety （0=none，1=slight，2=severe）	Anxiety(0=none，1=yes）	Anxiety score	Depression(0=none，1=yes）	Depression score	conjugal relation （2=good，1=general，0=deteriorate）	Frequency of masturbation（0=increased，1=unchaged，2=decreased, 3=none）	Frequency of pornography use（0=increased，1=unchaged，2=decreased, 3=none）	Intimacy during sex life（0=No sexual activity ，5=Very satisfied ，4=Relatively satisfied，3=Neutral ，2=Dissatisfied ，1=Very dissatisfied）	Sexual satisfaction （0=No sexual activity ，5=Very satisfied ，4=Relatively satisfied，3=Neutral ，2=Dissatisfied ，1=Very dissatisfied）	SS	Dyspareunia（0=Almost always，1=Always ，2=Sometimes ，3=Rarely ，4=Never ，5=Never tried)	Desire	Arousal	Lubrication	Orgasm	Coital pain	Overall satisfaction	FSFI score(=Desire+Arousal+Lub+Ora+Coi +overall satisfaction)	Sexual Dysfunction（0=yes，1=no）	QMI score	income	physical exercise	smoker（0=yes，1=no）	drinking（0=almost ，1=often，2=sometimes, 3=rarely，4=never）	education（0=high school，1=college，2=undergraduate，3=postgraduate）	change in sexual desire（2=increase，1=unchange，0=decrease）	change in frequency（2=increase，1=unchange，0=decrease）	change in sexual satisfaction（2=increase，1=unchange，0=decrease）
1	32	4	2	2	0	0	1	0	5	2	3	3	2	4	3	3	2.4	3.6	4.2	2.4	4	4	20.6	0	30	2	2	1	3	1	1	1	1
1	32	3	2	2	0	0	1	0	5	2	3	3	4	4	3	5	3.6	3.9	4.8	4.8	4.4	4.8	26.3	1	41	2	1	1	4	0	1	1	1
1	26	4	2	2	1	1	16	1	14	2	3	3	5	4	3	5	3.6	3.9	5.7	5.2	4.4	5.2	28	1	23	1	1	1	3	1	1	1	1
1	32	4	3	3	0	0	2	0	5	2	1	1	5	5	3	1	3.6	4.8	6	6	6	6	32.4	1	39	2	0	1	3	1	1	1	1
1	36	1	2	2	2	1	15	1	22	0	0	0	1	1	1	1	1.2	1.2	2.4	1.6	2	1.2	9.6	0	17	3	0	1	3	0	0	0	0
1	43	2	1	1	2	1	16	1	23	0	0	0	2	2	1	4	3.6	1.8	3.3	2.4	4.4	2.4	17.9	0	16	2	0	1	1	1	0	0	0
1	33	2	4	3	0	0	3	0	5	2	1	1	1	5	3	3	3.6	5.1	5.1	6	5.6	4.4	29.8	1	37	2	2	0	3	3	2	2	2
1	23	4	2	2	0	0	4	0	3	2	3	3	3	3	2	5	3	3.9	6	4.8	6	3.6	27.3	1	31	2	0	1	3	0	1	1	1
1	28	1	3	3	0	0	5	0	7	2	1	1	4	3	2	4	3	4.5	6	2.8	6	4	26.3	1	19	3	0	1	3	3	1	1	1
1	34	8	2	2	1	1	16	1	13	2	3	3	4	4	3	3	4.2	4.2	4.5	4.8	4.8	4.8	27.3	1	25	1	2	1	3	1	1	1	1
1	36	5	4	3	0	0	3	0	5	2	0	3	4	5	3	5	3	5.1	6	5.2	4.8	5.6	29.7	1	33	3	0	1	4	1	1	1	1
1	32	4	3	3	0	0	5	0	5	2	0	0	4	4	3	5	3	3.6	5.4	3.6	3.6	4.8	24	1	39	2	2	1	4	3	1	2	2
1	32	9	1	1	1	1	14	1	12	2	2	3	5	4	3	3	3.6	4.2	5.1	4.8	4.4	5.2	27.3	1	38	2	1	1	4	3	1	1	1
1	32	8	1	1	0	0	5	0	6	2	3	3	4	4	3	5	3.6	4.5	6	5.2	4.8	4.8	28.9	1	40	2	2	1	3	2	1	1	1
1	30	2	1	1	0	0	2	0	5	2	3	3	5	5	3	5	3.6	5.4	6	5.6	5.6	6	32.2	1	41	2	0	1	3	0	1	1	1
1	29	12	2	2	0	0	4	0	6	2	3	1	5	5	3	5	4.2	4.5	6	5.2	4.8	6	30.7	1	45	2	1	1	4	3	1	1	1
1	25	4	1	1	1	1	12	1	14	2	3	3	4	4	3	2	3	4.2	5.1	4.8	5.2	4.8	27.1	1	22	1	0	0	4	0	1	1	1
1	28	6	2	2	0	0	3	0	5	2	3	3	4	4	3	3	3.6	4.8	5.4	5.2	4.8	4.8	28.6	1	44	2	2	1	3	2	1	1	1
1	34	1	3	3	0	0	7	0	8	2	1	1	4	1	1	3	3	3.6	4.2	6	6	2.4	25.2	1	18	2	1	1	2	0	1	1	1
1	29	4	2	2	0	0	4	0	5	2	3	3	4	4	3	5	3.6	3.6	6	4.8	1.6	4.8	24.4	1	42	1	1	1	4	1	1	1	1
1	31	2	3	3	0	0	6	0	8	1	3	3	2	2	1	4	3	3.3	4.8	2.4	5.6	2.4	21.5	0	27	1	1	1	4	0	1	1	1
1	32	2	1	1	2	1	15	1	21	1	1	1	3	2	1	3	3	2.7	4.8	2.4	4	2.8	19.7	0	18	2	0	1	2	0	1	1	1
1	25	9	2	2	0	0	9	0	9	1	1	1	2	2	1	2	3.6	3.3	4.5	2.8	4.4	2.4	21	0	24	1	0	1	2	1	1	1	1
1	29	5	2	2	0	0	2	0	5	1	1	1	4	4	3	5	3.6	4.8	5.4	5.2	4	4.8	27.8	1	33	2	1	1	4	2	1	1	1
1	30	4.5	2	2	0	0	3	0	4	2	1	1	4	5	3	4	3.6	5.7	5.7	6	6	5.6	32.6	1	35	2	1	1	3	3	1	1	1
1	32	1	2	2	0	0	3	0	3	2	3	3	4	3	2	2	4.2	3.9	6	2.8	5.6	4	26.5	1	22	1	2	1	4	1	0	0	0
1	26	4	3	3	0	0	2	0	3	2	3	3	4	4	3	5	4.8	5.1	5.7	5.6	6	4.8	32	1	42	1	0	1	4	2	1	1	1
1	37	7	1	1	0	0	2	0	4	2	1	3	5	5	3	5	3.6	4.5	5.7	4.8	4.8	6	29.4	1	36	2	1	1	3	2	1	1	1
1	32	1	4	3	0	0	4	0	5	2	3	3	5	5	3	4	4.2	3.6	5.1	4	4.8	6	27.7	1	40	1	0	1	4	0	0	1	1
1	32	7	2	2	0	0	4	0	5	0	3	3	4	4	3	4	3.6	3.3	4.2	4	4.8	4.8	24.7	1	45	2	2	1	4	0	1	1	1
1	33	3	1	1	2	1	14	1	21	0	0	1	2	2	1	2	3.6	2.7	4.8	2.8	3.6	2.4	19.9	0	18	2	0	1	3	2	0	0	0
1	36	2	2	2	1	1	15	1	18	1	2	2	3	2	1	4	3.6	2.7	4.8	3.6	4	2.8	21.5	0	28	2	0	1	3	3	0	0	0
1	33	8	1	1	0	0	4	0	5	2	3	3	4	4	3	5	3.6	4.2	3.6	4.8	4.4	4.8	25.4	1	45	2	2	1	3	1	1	1	1
1	42	4	2	2	0	0	5	0	6	2	1	1	4	4	3	5	3.6	4.5	5.4	4.8	4.8	4.8	27.9	1	32	2	1	1	3	1	1	1	1
1	34	3	2	2	0	0	3	0	4	2	1	1	5	5	3	5	3.6	4.2	6	5.6	4.8	6	30.2	1	32	2	2	1	2	3	1	1	1
1	32	4	4	3	0	0	4	0	4	2	3	3	5	4	3	4	2.4	3.6	5.7	4.8	4.8	5.2	26.5	1	43	1	2	1	4	1	1	1	1
1	30	6	2	2	0	0	6	0	7	2	3	3	5	4	3	4	3.6	3.9	4.8	4.8	4.8	5.2	27.1	1	45	2	2	1	4	2	1	1	1
1	29	4	3	3	0	0	3	0	5	2	1	1	4	5	3	3	4.2	6	4.8	4	6	5.6	30.6	1	39	1	1	1	3	2	1	1	1
1	32	8	2	2	1	1	13	1	12	2	3	3	4	4	3	5	3	3	5.4	4.4	4.8	4.8	25.4	1	25	2	1	1	4	3	1	1	1
1	30	1	2	2	2	1	14	1	22	0	0	0	2	2	1	2	3.6	2.4	4.8	2.4	4	2.4	19.6	0	16	2	0	1	2	2	2	2	0
1	39	1	1	1	2	1	16	1	24	2	0	0	2	1	1	2	3.6	2.7	2.7	2.4	3.2	1.6	16.2	0	19	2	0	1	2	2	0	0	0
1	33	1	2	2	2	1	14	1	23	0	0	0	2	2	1	1	2.4	2.1	4.2	2.4	3.6	2.4	17.1	0	16	3	0	1	3	2	0	0	0
1	34	1	4	3	0	0	4	0	8	2	1	3	2	2	1	3	3	2.7	3.9	3.6	2	2.4	17.6	0	16	1	1	1	4	2	1	1	1
1	31	1	2	2	0	0	5	0	7	1	1	1	3	1	1	3	3.6	4.2	4.8	4.4	4.8	2	23.8	1	17	1	2	1	4	3	1	1	1
1	34	1	1	1	0	0	4	0	8	2	3	3	1	1	1	1	2.4	2.4	3.3	3.2	2.8	1.2	15.3	0	25	1	0	1	4	1	1	1	1
1	36	2	3	3	0	0	4	0	6	2	1	3	1	1	1	0	1.2	1.2	1.2	1.2	2	1.2	8	0	26	2	0	1	3	2	1	1	1
1	35	1	0	1	1	1	10	1	17	1	2	3	3	2	1	3	2.4	3.3	5.4	5.2	5.6	2.8	24.7	1	27	1	0	0	2	1	0	0	0
1	33	1	3	3	0	0	4	0	5	2	1	3	5	5	3	5	4.2	6	6	6	5.6	6	33.8	1	34	2	2	1	3	2	1	1	1
1	33	2	4	3	0	0	2	0	5	2	1	1	5	5	3	5	5.4	5.4	6	6	6	6	34.8	1	35	1	2	1	4	0	2	1	1
1	31	2.5	2	2	0	0	6	0	8	2	1	3	2	2	1	1	2.4	1.2	1.8	2	2.8	2.4	12.6	0	18	1	0	1	2	2	1	1	1
1	33	2	0	1	2	1	15	1	22	0	0	0	2	2	1	4	4.8	4.8	4.8	3.6	4.8	2.4	25.2	1	15	3	0	1	2	3	2	2	0
1	34	1	2	2	0	0	5	0	8	2	3	3	2	1	1	1	1.8	2.4	3.6	2.8	6	1.6	18.2	0	26	2	0	1	2	1	0	0	0
1	31	4	2	2	0	0	3	0	5	2	1	1	3	4	3	2	3.6	3.6	4.2	4.4	3.2	4.4	23.4	0	31	1	1	1	4	2	1	1	1
1	27	3	4	3	0	0	2	0	3	2	0	0	4	4	3	5	3.6	4.2	4.2	3.2	4.8	4.8	24.8	1	29	3	2	1	4	2	1	1	1
1	27	4	2	2	1	1	16	1	16	1	1	3	2	2	1	4	5.4	4.2	5.1	3.2	5.6	2.4	25.9	1	19	1	0	1	4	0	1	1	1
1	40	1	1	1	0	0	5	0	9	2	3	3	4	2	1	2	3.6	3.6	4.8	4	6	3.2	25.2	1	25	1	1	1	2	1	1	1	1
1	39	3	1	1	2	1	15	1	21	0	0	2	2	2	1	4	3.6	3.3	3.9	2.8	4.8	2.4	20.8	0	18	2	0	1	4	0	0	0	0
1	35	1	0	1	2	1	13	1	21	0	0	0	1	1	1	2	2.4	1.2	3.3	1.2	2	1.2	11.3	0	19	3	0	1	3	3	1	1	1
1	36	1	0	1	2	1	15	1	23	0	0	0	3	2	1	4	3.6	3.9	4.5	2.8	3.6	2.8	21.2	0	14	3	0	1	2	3	1	1	0
1	32	3	2	2	0	0	4	0	3	2	1	1	5	5	3	5	5.4	6	5.4	5.6	6	6	34.4	1	35	2	1	1	3	1	1	1	1
1	31	3	2	2	0	0	4	0	3	1	1	3	4	4	3	4	3	3.3	3.9	4	4.8	4.8	23.8	1	28	2	2	1	4	1	1	1	1
1	33	3	3	3	0	0	3	0	3	2	3	3	4	4	3	5	3	4.2	5.4	4.4	5.2	4.8	27	1	41	2	1	1	4	2	1	1	1
1	45	3	1	1	1	1	17	1	18	1	0	0	2	2	1	2	1.8	2.1	2.1	2.4	4.8	2.4	15.6	0	15	1	0	1	4	0	0	0	0
1	23	4	3	3	2	1	16	1	22	1	0	3	2	2	1	4	3.6	3	4.2	3.2	3.2	2.4	19.6	0	19	1	0	1	4	0	1	1	1
1	30	4	1	1	0	0	0	0	3	2	3	3	4	5	3	5	3.6	5.1	5.4	5.2	5.6	5.6	30.5	1	32	3	2	1	4	1	1	1	1
1	39	4	2	2	0	0	3	0	3	2	1	1	1	5	3	4	4.8	6	6	4.8	4.8	4.4	30.8	1	28	1	1	0	3	0	1	1	1
1	31	3	1	1	1	1	16	1	14	2	3	3	4	4	3	2	3.6	4.2	4.5	4.8	4	4.8	25.9	1	21	1	2	1	4	3	1	1	1
1	36	3	4	3	0	0	0	0	3	2	1	3	4	4	3	2	2.4	3.6	5.4	4.8	4.8	4.8	25.8	1	35	1	0	1	4	0	1	1	1
1	40	3	3	3	0	0	1	0	3	2	0	3	5	4	3	2	4.8	3.6	3.9	5.6	6	5.2	29.1	1	34	1	2	1	4	0	1	1	1
1	28	3	1	1	0	0	4	0	4	1	0	0	5	5	3	5	4.8	5.4	5.7	6	6	6	33.9	1	38	2	1	1	4	1	2	2	2
1	30	1	2	2	0	0	5	0	9	0	0	0	2	2	1	2	3.6	3	2.7	3.2	3.6	2.4	18.5	0	19	1	2	1	3	0	0	0	0
1	33	2.5	1	1	1	1	12	1	19	0	0	0	2	2	1	3	3	3.6	3.9	4	4.8	2.4	21.7	0	19	2	2	1	3	1	0	0	0
1	33	3	2	2	0	0	1	0	4	2	3	3	4	4	3	5	3	4.2	5.7	5.6	5.2	4.8	28.5	1	41	2	0	1	4	0	1	1	1
1	27	4	3	3	0	0	4	0	4	1	0	0	4	4	3	4	4.8	4.8	5.7	5.2	4.8	4.8	30.1	1	35	1	0	1	4	0	2	2	2
1	37	1.5	0	1	0	0	1	0	4	2	1	3	4	4	3	4	3	3.9	5.7	4.4	5.2	4.8	27	1	36	1	0	1	4	0	1	1	1
1	39	3	1	1	0	0	3	0	4	2	0	3	5	5	3	4	4.2	5.7	5.4	6	5.6	6	32.9	1	40	1	2	1	2	1	1	1	1
1	42	4	1	1	1	1	12	1	13	2	0	0	4	4	3	5	3.6	4.8	4.8	4	4.4	4.8	26.4	1	20	1	2	1	4	0	1	1	1
1	32	3	2	2	0	0	2	0	4	1	3	3	4	4	3	2	3.6	3.6	4.8	4.8	4.4	4.8	26	1	31	1	0	1	3	0	1	1	1
1	27	3	2	2	0	0	2	0	4	2	3	3	5	5	3	5	4.2	6	6	6	6	6	34.2	1	30	1	0	1	3	1	1	1	1
1	28	4	2	2	1	1	12	1	17	2	2	2	4	4	3	4	3.6	4.8	3.9	4.4	6	4.8	27.5	1	32	1	2	1	3	1	1	1	0
1	33	4	3	3	0	0	4	0	5	2	2	3	5	5	3	4	3.6	5.7	5.4	6	5.2	6	31.9	1	33	1	2	1	3	2	2	2	2
1	32	4	2	2	0	0	5	0	6	2	3	3	4	4	3	3	3.6	4.2	4.8	4.4	5.2	4.8	27	1	42	2	0	1	3	1	1	1	1
1	34	3	2	2	1	1	12	1	16	2	3	3	4	4	3	3	4.8	5.4	6	6	6	4.8	33	1	20	1	1	1	4	2	1	1	1
1	30	4	3	3	0	0	6	0	5	2	3	3	4	3	2	3	1.2	2.4	4.5	3.2	4	4	19.3	0	20	2	1	1	4	3	1	1	1
1	28	2	1	1	0	0	3	0	5	2	3	1	3	3	2	2	2.4	2.1	4.8	2	5.2	3.6	20.1	0	28	2	0	0	1	0	0	0	1
1	36	3	2	2	1	1	12	1	16	1	0	1	4	4	3	2	3.6	3.6	5.7	4.8	4.8	4.8	27.3	1	21	2	1	1	3	3	1	1	1
1	37	4	3	3	0	0	3	0	6	1	1	3	3	4	3	2	3	2.7	4.5	3.6	4.8	4.4	23	0	33	2	1	1	4	2	0	0	1
1	34	2	3	3	0	0	3	0	6	2	3	3	5	5	3	5	3.6	3.9	6	5.6	6	6	31.1	1	31	2	1	1	3	1	1	1	1
1	39	4	1	1	0	0	4	0	5	2	1	1	3	3	2	3	2.4	2.4	4.5	2.4	4.4	3.6	19.7	0	21	1	2	1	4	2	1	1	1
1	36	2.5	2	2	0	0	6	0	8	2	1	2	3	3	2	3	3.6	4.2	5.4	4.4	6	3.6	27.2	1	20	1	2	1	3	1	1	1	1
1	32	4	2	2	0	0	4	0	6	2	3	3	4	4	3	5	2.4	4.2	5.4	5.2	4.8	4.8	26.8	1	42	1	2	1	4	1	1	1	1
1	31	4	1	1	0	0	3	0	6	2	2	3	5	4	3	5	4.2	5.4	6	5.2	5.2	5.2	31.2	1	33	2	2	1	3	3	1	1	1
1	34	4	0	1	0	0	5	0	3	2	1	1	3	3	2	5	2.4	3.9	5.4	4.4	2.4	3.6	22.1	0	21	1	1	1	3	3	1	1	1
1	36	1	0	1	2	1	15	1	21	0	0	0	3	2	1	4	3.6	3.9	4.5	2.8	3.6	2.8	21.2	0	27	3	0	1	2	3	1	1	0
1	30	1	2	2	0	0	6	0	3	2	3	3	3	3	2	3	1.8	4.2	4.8	5.2	6	3.6	25.6	1	28	3	0	1	4	0	1	1	0
1	35	2	2	2	0	0	4	0	3	2	3	3	4	3	2	3	2.4	3.3	5.4	4.8	4.8	4	24.7	1	20	1	1	1	3	2	1	1	1
1	44	1.5	3	3	0	0	6	0	3	2	3	3	3	3	2	4	3	3	5.4	3.6	4.4	3.6	23	0	29	1	2	1	4	1	1	1	1
1	35	4	2	2	0	0	9	0	7	1	1	3	2	2	1	3	2.4	2.4	4.5	3.2	4.8	2.4	19.7	0	19	1	0	1	3	2	1	1	1
1	30	4	2	2	0	0	2	0	4	2	1	3	3	3	2	2	3	2.7	3.6	4	4.8	3.6	21.7	0	21	1	1	0	2	0	1	1	1
1	30	2	2	2	0	0	4	0	3	1	1	1	3	3	2	5	3.6	3.3	5.4	5.2	5.6	3.6	26.7	1	19	1	1	1	4	1	1	1	1
2	39	3	1	1	1	1	13	1	16	2	2	3	4	4	3	4	3.6	3.9	6	5.2	6	4.8	29.5	1	31	2	1	1	3	2	1	1	0
2	30	2	2	2	0	0	4	0	4	2	3	3	4	4	3	2	3	3.9	5.4	5.2	3.6	4.8	25.9	1	30	2	0	1	3	1	1	1	1
2	40	1	2	2	1	0	9	1	14	2	2	2	4	4	3	3	3.6	3.6	4.8	4	4.8	4.8	25.6	1	29	2	1	1	4	1	0	0	1
2	39	4	2	2	0	0	9	0	6	1	1	1	2	2	1	2	2.4	2.4	4.5	2.4	4.8	2.4	18.9	0	19	1	1	1	4	2	1	1	1
2	35	3	2	2	0	0	3	0	0	2	3	3	5	5	3	5	3.6	3.6	6	4.8	4.8	6	28.8	1	42	2	1	1	4	2	1	1	1
2	33	4	2	2	0	0	4	0	4	2	1	3	4	4	3	4	3.6	4.2	5.4	4.4	5.6	4.8	28	1	42	1	2	1	4	1	0	0	0
2	30	6	3	3	0	0	5	0	5	2	1	1	5	5	3	5	3.6	5.7	6	6	6	6	33.3	1	40	1	2	1	4	1	1	1	1
2	31	2	2	2	0	0	3	0	2	2	1	1	4	4	3	3	3.6	3.9	4.8	4	3.2	4.8	24.3	1	35	3	1	1	4	2	1	1	1
2	29	4	1	1	1	1	10	1	13	1	1	3	4	4	3	4	2.4	2.7	5.1	4.4	4.4	4.8	23.8	1	22	2	0	1	3	0	0	0	1
2	41	4	1	1	0	0	8	0	9	2	3	3	4	4	3	2	2.4	2.4	4.5	4.4	4	4.8	22.5	0	22	1	2	1	4	2	1	1	1
2	34	3	1	1	1	1	10	1	13	2	1	2	4	4	3	2	4.2	3.3	4.8	4	4.8	4.8	25.9	1	21	2	2	1	4	2	1	1	2
2	49	1	2	2	0	0	4	0	4	2	3	3	3	3	2	4	1.8	2.4	3.6	2.8	4.4	3.6	18.6	0	20	2	0	1	4	1	1	1	1
2	42	1	1	1	0	0	5	0	9	2	1	1	5	3	2	5	5.4	5.7	5.7	6	5.6	4.4	32.8	1	20	2	0	1	4	3	1	1	1
2	36	3	1	1	0	0	4	0	3	2	1	1	3	3	2	3	3.6	3.9	4.8	5.2	5.2	3.6	26.3	1	20	2	2	1	3	0	1	1	1
2	29	6	4	3	0	0	3	0	2	2	1	1	4	4	3	5	3.6	4.2	6	3.2	6	4.8	27.8	1	36	2	2	1	4	1	2	0	1
2	38	2	2	2	1	1	10	1	14	2	1	1	5	5	3	5	4.2	5.4	6	5.6	6	6	33.2	1	34	2	1	1	3	2	1	1	1
2	33	4	2	2	0	0	3	0	5	2	3	3	4	4	3	3	3	3.3	6	5.2	5.2	4.8	27.5	1	42	2	1	1	4	2	1	1	1
2	35	4	2	2	0	0	3	0	5	2	1	3	4	4	3	5	3.6	5.4	6	6	6	4.8	31.8	1	37	2	2	1	4	1	1	1	1
2	29	4	1	1	0	0	4	0	5	2	1	1	3	3	2	4	3	3.6	5.7	4.4	5.2	3.6	25.5	1	21	2	2	1	4	2	1	1	1
2	31	4	2	2	0	0	3	0	4	2	3	3	4	4	3	5	2.4	5.1	5.7	5.6	6	4.8	29.6	1	42	2	0	1	4	0	1	1	1
2	35	4	3	3	0	0	3	0	6	2	2	3	3	4	3	2	3	3.6	4.8	5.2	5.2	4.4	26.2	1	31	3	2	1	4	0	1	1	1
2	33	3	2	2	0	0	3	0	3	2	1	3	3	3	2	3	3.6	3.9	6	3.6	4.8	3.6	25.5	1	20	1	1	1	4	2	1	1	1
2	32	4	2	2	1	1	10	1	16	2	1	1	3	3	2	2	3	3	4.8	4	4.8	3.6	23.2	0	21	2	0	1	3	2	1	1	1
2	40	4	3	3	0	0	2	0	3	2	3	3	4	5	3	5	3	4.5	5.4	5.2	5.6	5.6	29.3	1	43	2	1	0	4	0	1	1	1
2	33	4	2	2	0	0	3	0	5	2	3	3	5	5	3	3	4.2	5.1	6	5.2	4.8	6	31.3	1	43	2	2	1	4	3	1	1	1
2	32	2	3	3	0	0	4	0	4	2	1	1	4	4	3	3	4.2	2.7	4.8	4.4	5.2	4.8	26.1	1	37	2	2	1	4	2	1	1	1
2	35	5	2	2	0	0	3	0	4	2	1	3	4	4	3	3	3	3.6	5.7	5.2	5.6	4.8	27.9	1	39	1	1	1	4	0	1	1	1
2	34	5	1	1	1	1	10	1	16	2	1	1	5	5	3	3	3.6	5.4	6	5.6	5.2	6	31.8	1	24	1	1	1	3	2	1	1	1
2	37	3	3	3	0	0	3	0	2	2	3	1	5	5	3	5	1.8	5.1	6	5.2	4.8	6	28.9	1	42	2	1	1	3	2	1	1	1
2	38	4	2	2	0	0	5	0	6	2	1	3	3	3	2	2	3	3.6	4.2	4	3.6	3.6	22	0	21	1	0	1	4	2	1	1	1
2	35	4	2	2	0	0	4	0	4	2	3	3	4	4	3	5	3	4.8	5.7	4.8	6	4.8	29.1	1	41	2	0	1	4	2	1	1	1
2	33	1	2	2	0	0	8	0	8	2	3	3	1	1	1	4	2.4	1.2	3.9	3.6	4.4	1.2	16.7	0	20	2	0	1	3	3	1	1	1
2	43	4	1	1	0	0	2	0	4	2	1	1	4	4	3	3	3.6	4.2	6	5.2	6	4.8	29.8	1	34	2	2	1	3	2	1	1	1
2	42	2	2	2	0	0	6	0	3	2	3	3	3	3	2	4	2.4	3	5.1	4	4.4	3.6	22.5	0	29	2	0	1	3	0	1	1	1
2	30	4	1	1	1	1	13	1	14	2	1	3	5	5	3	3	4.2	6	6	6	4.8	6	33	1	36	2	2	1	4	3	1	1	1
2	35	3	2	2	0	0	3	0	6	2	1	3	5	5	3	5	3.6	5.4	5.7	6	6	6	32.7	1	37	1	1	1	3	1	1	1	1
2	33	7	3	3	0	0	3	0	4	2	3	3	4	4	3	4	3	3.6	5.4	4.8	6	4.8	27.6	1	45	2	2	1	4	0	1	1	1
2	25	9	1	1	0	0	4	0	2	2	3	3	4	4	3	4	5.4	5.7	6	5.6	6	4.8	33.5	1	43	1	2	1	3	1	2	2	1
2	32	2.5	1	1	1	0	9	1	15	2	2	3	3	3	2	4	3	2.7	4.5	2.4	5.2	3.6	21.4	0	30	1	0	1	4	0	1	1	0
2	40	5	1	1	0	0	5	0	3	2	3	3	4	3	2	5	1.2	2.4	4.8	2.4	6	4	20.8	0	33	1	0	1	4	0	1	1	1
2	31	4	1	1	0	0	4	0	6	1	2	3	4	4	3	2	3.6	4.8	5.4	5.2	4.4	4.8	28.2	1	32	1	2	1	4	2	1	0	1
2	31	4	2	2	1	1	12	1	16	2	1	1	4	3	2	2	2.4	2.4	4.8	4.4	5.2	4	23.2	0	22	2	2	1	3	2	1	1	1
2	36	4	2	2	0	0	6	0	8	2	3	3	4	4	3	4	3.6	4.5	6	5.6	4.8	4.8	29.3	1	42	3	1	1	3	2	1	1	1
2	33	1	3	3	0	0	3	0	4	2	1	1	3	4	3	3	3	3.3	4.8	3.6	4.4	4.4	23.5	1	34	1	1	1	3	0	1	1	1
2	30	5	2	2	0	0	3	0	6	2	3	3	4	4	3	3	3.6	3.9	6	4.8	5.2	4.8	28.3	1	43	2	1	1	3	2	1	0	1
2	39	2	1	1	2	1	15	1	21	0	0	0	2	2	1	2	3	2.7	3.6	2.4	3.6	2.4	17.7	0	25	1	0	1	2	2	0	0	0
2	34	2	2	2	0	0	4	0	6	2	2	3	3	3	2	2	2.4	3	5.4	4	3.6	3.6	22	0	29	2	2	1	4	2	0	1	1
2	41	4	2	2	0	0	3	0	5	2	3	3	5	5	3	5	3.6	4.8	5.7	5.2	6	6	31.3	1	43	2	0	1	4	2	2	2	2
2	32	2	2	2	1	1	12	1	15	1	3	3	4	4	3	4	3.6	3.6	5.1	4.4	4.4	4.8	25.9	1	28	1	0	1	3	0	0	0	0
2	38	2	2	2	0	0	2	0	3	2	1	1	5	4	3	5	3	3.6	5.7	4.8	6	5.2	28.3	1	35	1	1	1	4	2	1	1	1
2	34	6	1	1	0	0	4	0	5	2	3	3	5	5	3	5	3	5.4	6	5.6	5.2	6	31.2	1	43	1	2	1	4	2	1	1	1
2	33	5	2	2	1	1	10	1	13	2	3	3	5	5	3	2	3.6	3.9	4.5	4.8	4	6	26.8	1	24	1	0	0	2	0	2	2	1
2	36	7	1	1	0	0	4	0	7	2	3	3	3	3	2	2	3	3.6	4.5	4	3.6	3.6	22.3	0	29	2	0	1	3	1	1	1	1
2	29	6	2	2	0	0	1	0	2	2	1	1	4	4	3	2	3.6	4.2	4.8	4.8	4.8	4.8	27	1	32	1	1	1	4	2	1	1	1
2	30	4	3	3	0	0	3	0	4	2	1	1	4	3	2	2	3.6	4.5	5.4	5.2	4.8	4	27.5	1	22	1	0	1	3	0	1	1	0
2	28	2	1	1	0	0	4	0	7	2	1	3	4	4	3	2	3	3.9	5.1	4.8	4.8	4.8	26.4	1	30	2	1	1	3	1	1	1	1
2	31	4	2	2	1	1	12	1	18	2	1	1	3	3	2	2	3.6	3.6	5.1	4.4	5.2	3.6	25.5	1	21	1	0	1	3	2	1	1	1
2	35	2	1	1	1	1	11	1	16	2	2	3	4	4	3	2	3.6	3.9	5.7	4.4	5.6	4.8	28	1	30	1	2	1	4	2	1	1	1
2	27	15	4	3	0	0	4	0	5	2	3	3	4	4	3	4	3	4.5	6	5.2	6	4.8	29.5	1	40	2	0	1	4	0	1	1	1
2	27	13	0	1	0	0	4	0	7	1	3	3	4	4	3	5	4.2	4.2	3.6	4.8	6	4.8	27.6	1	40	2	0	1	3	0	1	1	1
2	31	6	2	2	0	0	3	0	5	2	3	1	5	4	3	5	3.6	4.2	5.1	4.8	5.6	5.2	28.5	1	42	1	1	0	4	1	1	1	1
2	31	4	2	2	0	0	6	0	7	2	3	3	5	4	3	3	4.2	4.5	5.4	5.6	5.2	5.2	30.1	1	43	1	1	1	4	0	1	1	1
2	32	4	2	2	0	0	2	0	2	2	3	3	4	4	3	3	3	3.6	6	4.8	5.2	4.8	27.4	1	42	2	2	1	3	1	1	1	1
2	28	8	2	2	0	0	3	0	4	2	3	3	5	5	3	5	5.4	6	6	6	6	6	35.4	1	45	1	2	1	4	2	1	1	1
2	36	8	2	2	0	0	2	0	6	2	3	3	4	4	3	3	3	3.3	4.8	3.6	6	4.8	25.5	1	45	1	1	1	1	0	1	1	1
2	33	4	2	2	0	0	3	0	5	2	3	3	4	4	3	2	2.4	3.6	4.2	4.4	5.2	4.8	24.6	1	21	3	1	1	3	0	0	0	1
2	42	5	0	1	0	0	2	0	2	2	3	3	3	4	3	4	3.6	3.6	6	4	4.8	4.4	26.4	1	42	2	1	1	3	2	1	1	1
2	31	8	2	2	0	0	2	0	8	2	1	3	4	5	3	5	3.6	4.5	6	5.6	5.6	5.6	30.9	1	36	2	0	1	4	3	1	1	1
2	34	4	2	2	1	1	11	1	12	2	3	1	5	5	3	4	3.6	5.7	6	6	6	6	33.3	1	23	1	2	1	3	2	1	1	1
2	33	5	1	1	0	0	5	0	7	2	3	3	3	3	2	4	3	3	4.8	4.4	4.8	3.6	23.6	1	31	3	0	1	3	1	1	1	1
2	27	10	3	3	0	0	3	0	5	2	3	3	4	4	3	4	3.6	4.5	5.7	4.8	4.8	4.8	28.2	1	41	1	1	1	4	0	1	1	1
2	36	3.5	1	1	0	0	5	0	6	1	3	3	3	3	2	4	4.2	4.8	5.4	4.8	4.8	3.6	27.6	1	30	2	0	1	3	1	1	1	1
2	41	2.5	2	2	0	0	6	0	8	2	3	3	3	3	2	2	1.2	2.7	5.1	2.4	4.8	3.6	19.8	0	20	1	0	1	3	2	1	1	1
2	34	1	2	2	0	0	2	0	2	2	1	3	3	3	2	2	2.4	2.4	3	2.8	4.4	3.6	18.6	0	18	1	2	1	4	2	1	1	1
2	30	1	1	1	1	0	8	1	11	2	2	3	5	5	3	5	3.6	4.2	3.9	4	3.6	6	25.3	1	30	1	1	1	3	0	1	1	1
2	30	5	2	2	0	0	2	0	5	2	3	3	4	4	3	3	3.6	4.2	5.1	4.8	4.8	4.8	27.3	1	43	3	0	1	4	0	1	1	1
2	33	6	3	3	0	0	3	0	6	2	3	3	4	5	3	5	3.6	5.4	5.4	6	4.8	5.6	30.8	1	41	2	1	1	4	1	1	1	1
2	33	3	2	2	0	0	3	0	5	2	3	3	4	4	3	5	1.2	1.8	5.4	3.6	4.4	4.8	21.2	0	31	2	0	1	4	0	1	1	1
2	29	8	2	2	0	0	4	0	5	1	3	3	4	5	3	5	3.6	4.8	4.8	5.2	4.8	5.6	28.8	1	45	2	2	1	3	2	1	1	1
2	32	2	3	3	0	0	1	0	4	2	3	3	4	4	3	5	2.4	3	5.4	4.8	5.6	4.8	26	1	40	1	2	1	3	0	1	1	1
2	30	2	2	2	0	0	2	0	5	2	1	1	4	4	3	3	3.6	3.3	4.2	3.6	5.6	4.8	25.1	1	33	2	1	1	4	3	1	1	1
2	37	8	2	2	0	0	3	0	6	2	3	3	4	4	3	5	3	3.9	6	5.2	6	4.8	28.9	1	45	3	2	1	2	2	1	1	1
2	35	4	2	2	0	0	4	0	6	1	1	3	2	2	1	3	2.4	2.4	4.5	3.2	4.8	2.4	19.7	0	19	1	0	1	3	2	1	1	1
2	31	5	2	2	0	0	2	0	5	2	1	1	2	2	1	1	2.4	2.4	2.7	2.8	2.4	2.4	15.1	0	20	1	1	1	4	0	1	1	1
2	34	2	2	2	0	0	5	0	6	1	1	0	2	2	1	2	2.4	1.8	1.2	1.2	1.6	2.4	10.6	0	17	1	2	1	2	1	1	1	1
2	34	1	4	3	0	0	6	0	7	2	2	2	4	2	1	5	4.2	1.8	4.5	3.6	6	3.2	23.3	0	28	1	2	1	4	2	1	0	1
2	33	3	4	3	0	0	4	0	6	2	1	1	2	2	1	0	1.8	1.5	1.2	2.4	1.6	2.4	10.9	0	18	3	2	1	4	2	1	1	1
2	39	1.5	2	2	1	1	11	1	16	2	2	2	3	2	1	3	3.6	3.6	4.5	6	5.2	2.8	25.7	1	28	2	2	1	3	2	0	1	1
2	31	10	4	3	0	0	1	0	6	2	1	3	5	5	3	4	4.2	5.7	5.1	4.8	6	6	31.8	1	39	1	2	1	4	1	1	1	1
2	31	5	2	2	0	0	5	0	6	2	1	3	5	5	3	5	3.6	3.3	6	5.2	6	6	30.1	1	34	2	0	1	3	1	1	1	1
2	30	12	1	1	0	0	5	0	4	2	3	3	5	5	3	5	4.8	5.4	5.1	5.2	6	6	32.5	1	35	2	1	1	4	2	1	1	1
2	37	4	2	2	1	0	8	1	14	2	3	2	4	5	3	5	3.6	5.4	5.1	5.2	4.8	5.6	29.7	1	22	1	2	1	4	0	1	1	1
2	28	3.5	2	2	0	0	3	0	7	1	2	3	5	5	3	2	2.4	4.5	4.5	4.4	4	6	25.8	1	33	1	2	0	4	0	0	0	0
2	28	17.5	3	3	0	0	3	0	6	2	1	1	5	5	3	5	5.4	4.5	6	4.8	6	6	32.7	1	39	3	0	1	4	2	1	1	1
2	35	1	1	1	0	0	4	0	6	2	1	3	5	5	3	3	2.4	3.9	4.5	4.8	4.8	6	26.4	1	30	2	0	1	4	2	1	1	1
2	35	4	1	1	0	0	2	0	8	2	1	1	5	5	3	5	3	6	6	6	6	6	33	1	37	2	1	1	4	2	1	1	1
2	28	6	2	2	0	0	5	0	6	2	1	1	5	5	3	5	3	4.5	4.8	5.2	4.8	6	28.3	1	35	1	2	1	3	2	1	1	1
2	21	7.5	2	2	0	0	3	0	4	2	0	0	5	5	3	5	6	6	6	6	6	6	36	1	39	1	2	1	4	0	2	2	2
2	30	2	3	3	0	0	4	0	4	0	3	3	5	5	3	3	3.6	4.8	4.2	4.8	5.2	6	28.6	1	41	1	2	1	3	0	1	1	1
2	33	5	4	3	1	1	13	1	16	2	3	3	5	5	3	5	3.6	5.1	6	6	6	6	32.7	1	22	2	2	1	4	0	1	1	1
